# Supplementary material
Source: Springer Nature journal article supplement (https://www.springermedizin.de/resource/supplementary/12961_2002_2_MOESM4_ESM.pdf/9570820)
Supplement: MOESM4 [file 9570820]

THE STOCK OR RESERVOIR OF KNOWLEDGE

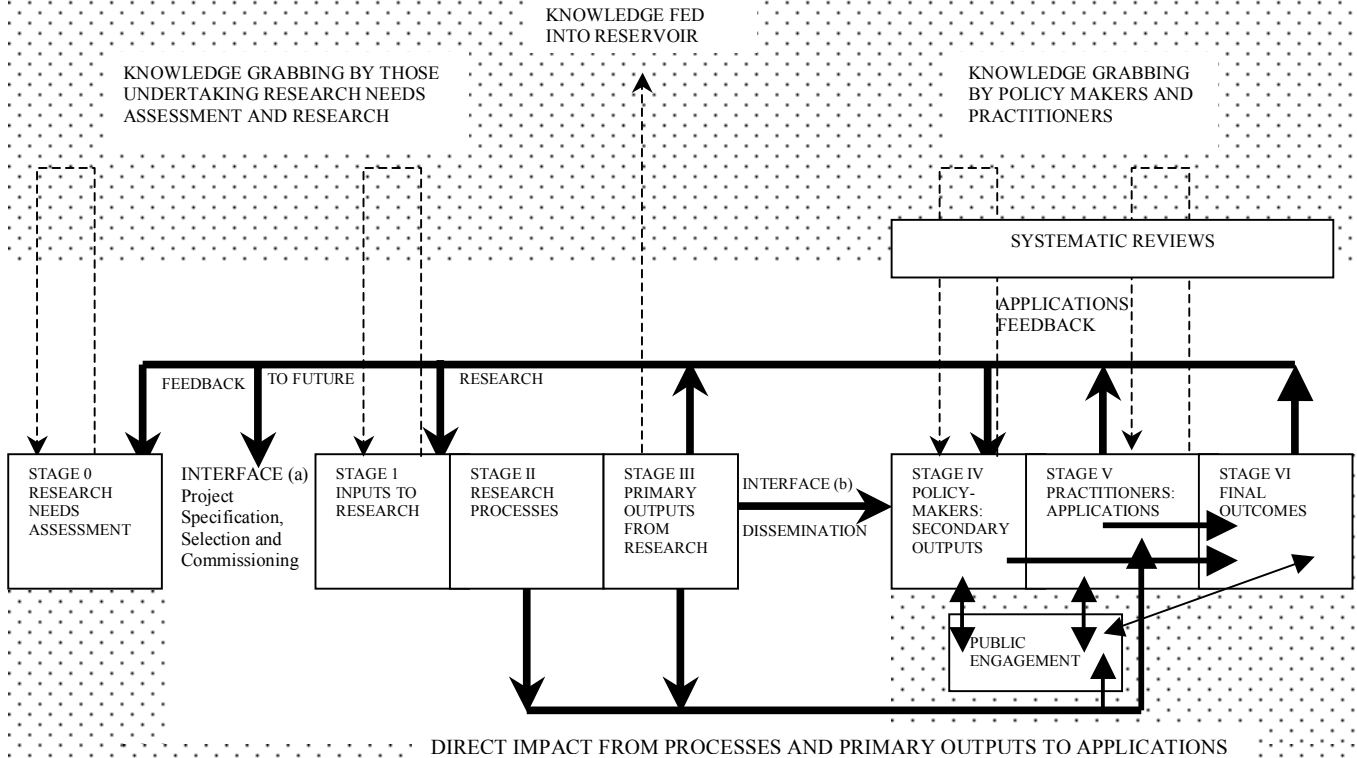

THE POLITICAL AND PROFESSIONAL ENVIRONMENTS AND WIDER SOCIETY
